# Supplementary material for: Analyzing growth and change: latent variable growth curve modeling with an application to clinical trials
Source: Springer Nature journal article supplement (doi:10.1007/s11136-007-9290-5), 2007-12-13
Supplement: MOESM2 [file 11136_2007_9290_MOESM2_ESM.dat]

1.198  3.362  3.243  3.189  3.203  1.229  1.244  1.262  1.746  0.500

 0.086
 0.022    0.948
 0.021    0.643    0.957
 0.018    0.583    0.613    0.985
 0.020    0.517    0.566    0.621    0.950   
 0.070    0.031    0.031    0.022    0.029    0.131   
 0.070    0.032    0.031    0.035    0.034    0.085    0.133   
 0.071    0.034    0.036    0.036    0.043    0.092    0.102    0.154
 0.062    0.322    0.310    0.448    0.468    0.074    0.113    0.144    4.303
 0.002    0.007    0.010    0.004    0.005   -0.007   -0.007   -0.006    0.048   0.250
